# Supplementary material
Source: PubMed Central journal article supplement (PMC4194098)
Supplement: embj0033-1639-sd3.pdf [file embj0033-1639-sd3.pdf]

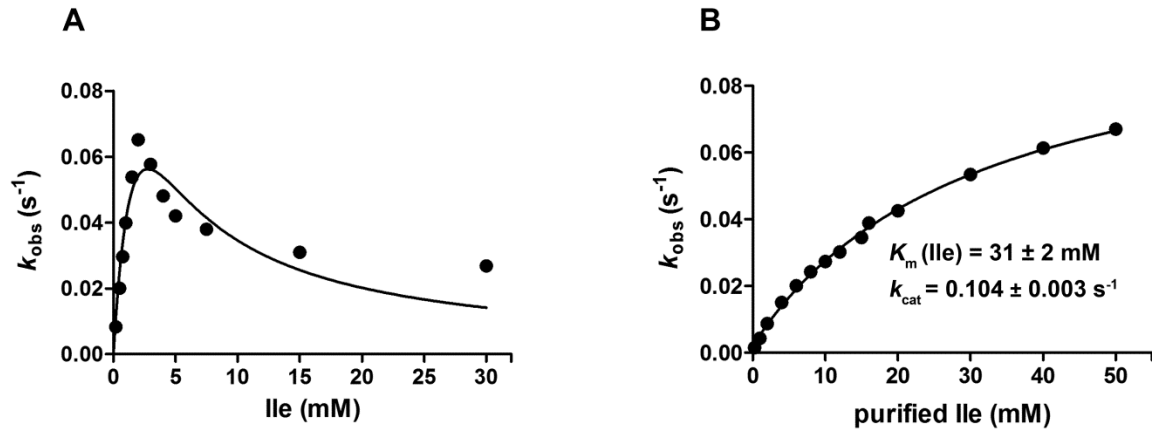

**Figure S3. Presence of leucine in isoleucine samples may cause kinetic artefacts in overall editing reactions.**

A,  $k_{obs}$  in AMP formation vs concentration of the unpurified commercial isoleucine that contains 0.38 % of leucine. The data is fit to the substrate inhibition equation:

$$k_{obs} = k_{max} \times [S] / (K_m + [S] \times (1 + [S]/K_i)).$$

B,  $k_{obs}$  in AMP formation vs concentration of the purified isoleucine that contains  $(3.5 \pm 0.7) \times 10^{-4}$  % leucine. The data is fit to the Michaelis-Menten equation:  $k_{obs} = k_{max} \times [S] / (K_m + [S])$ .
