# Supplementary material
Source: PubMed Central journal article supplement (PMC4194098)
Supplement: embj0033-1639-sd7.pdf [file embj0033-1639-sd7.pdf]

**Table S1. Steady-state parameters for activation of various isoleucine samples by WT EcLeuRS<sup>a</sup>**<sup>a</sup> Measured by ATP-PP<sub>i</sub> exchange assay.

| AA                                       | % Leu <sup>b</sup>             | <i>K<sub>m</sub></i> (AA) | <i>k<sub>cat</sub></i> | <i>k<sub>cat</sub>/K<sub>m</sub></i> | Discrimination factor <sup>c</sup> |
|------------------------------------------|--------------------------------|---------------------------|------------------------|--------------------------------------|------------------------------------|
|                                          |                                | mM                        | s <sup>-1</sup>        | mM <sup>-1</sup> s <sup>-1</sup>     |                                    |
| commercial Ile<br>(Sigma BioUltra lot 1) | 0.38 ± 0.03                    | 5.0 ± 0.4                 | 65 ± 2                 | 13                                   | 102                                |
| commercial Ile<br>(Sigma BioUltra lot 2) | (19 ± 2) × 10 <sup>-4</sup>    | 23                        | 3.8                    | 0.17                                 | 7765                               |
| purified Ile<br>(Sigma BioUltra lot 2)   | (3.5 ± 0.7) × 10 <sup>-4</sup> | 26 ± 7                    | 1.1 ± 0.1              | 0.042                                | 31429                              |

<sup>b</sup> Determined kinetically- see Supplementary Materials and Methods.<sup>c</sup> Discrimination factor is defined as (*k<sub>cat</sub>/K<sub>m</sub>*)<sub>cognate</sub>/(*k<sub>cat</sub>/K<sub>m</sub>*)<sub>non-cognate</sub>.

The values represent the best fit value ± S.E. of at least two independent experiments.
